# Supplementary material for: Underwater light environment in Arctic fjords
Source: Copernicus journal article supplement (doi:10.5194/essd-16-2773-2024), 2024-06-14
Supplement: Supplementary file 1 [file essd-16-2773-2024-supplement.pdf]

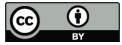

*Supplement of*

## **Underwater light environment in Arctic fjords**

**Robert W. Schlegel et al.**

*Correspondence to:* Robert W. Schlegel ([robert.schlegel@imev-mer.fr](mailto:robert.schlegel@imev-mer.fr)) and Jean-Pierre Gattuso ([jean-pierre.gattuso@imev-mer.fr](mailto:jean-pierre.gattuso@imev-mer.fr))

The copyright of individual parts of the supplement might differ from the article licence.

## Supplementary

### S1 Shallow monthly climatology $P$ -functions per site

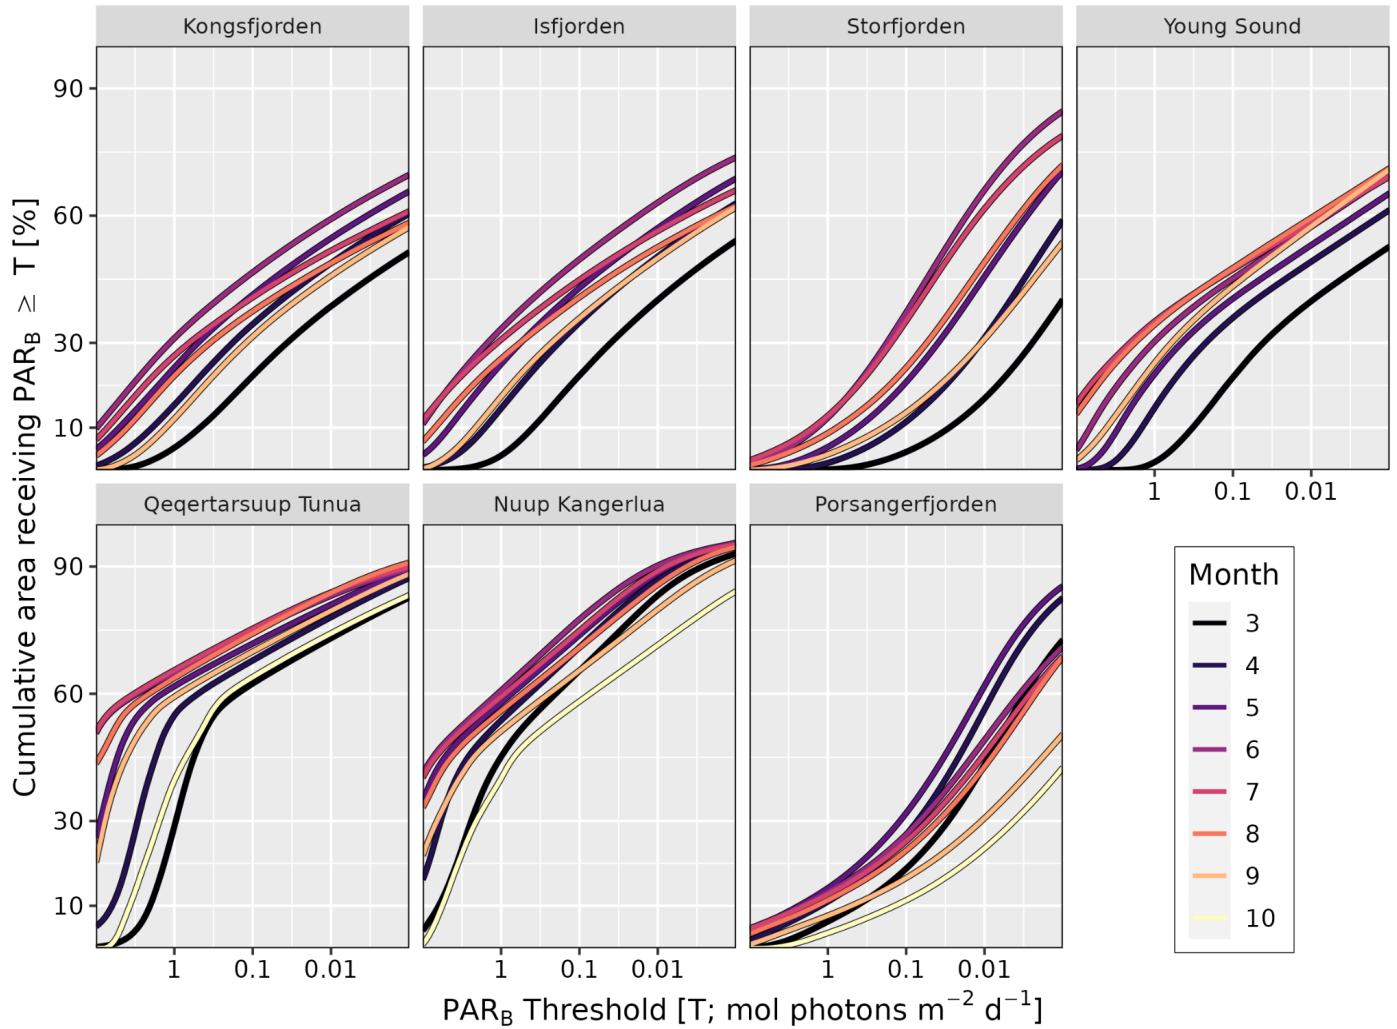

5 **Figure S1:** Shallow (i.e. depth  $\leq 50$  m)  $P$ -functions per site for the monthly climatology of bottom PAR ( $PAR_B$ ). Otherwise the same as Fig. 5.

## S2 Shallow yearly climatology $P$ -functions per site

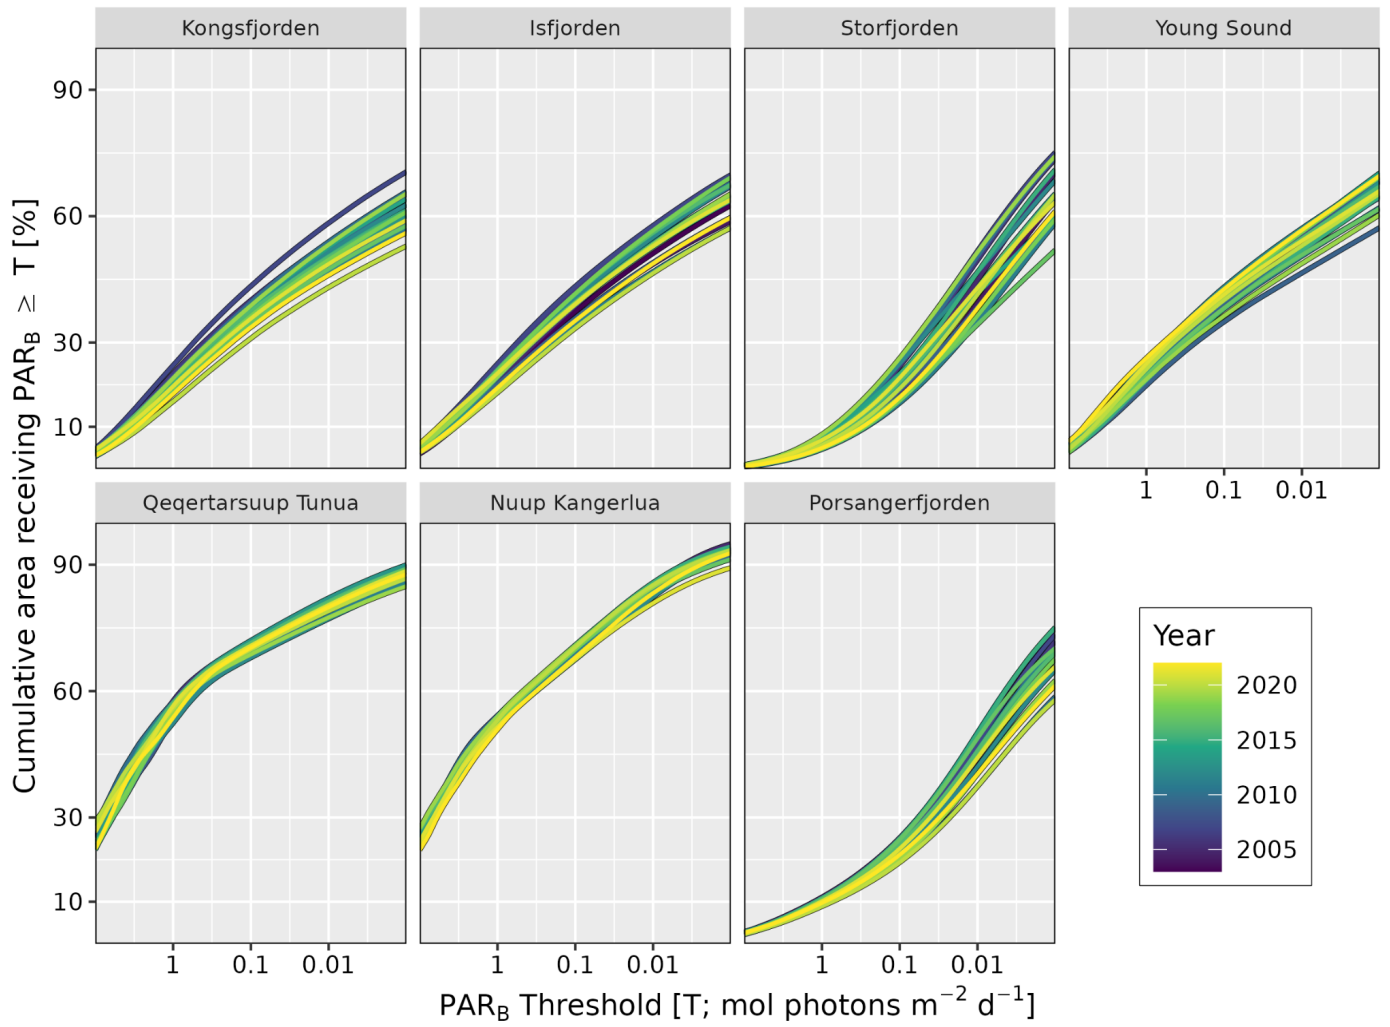

**Figure S2:** Shallow (i.e. depth  $\leq 50$  m)  $P$ -functions per site for annual average bottom PAR ( $PAR_B$ ). Otherwise the same as Fig. 5.



|                    |    |      |      |      |      |      |      |      |      |      |      |      |      |      |      |      |      |      |      |      |      |
|--------------------|----|------|------|------|------|------|------|------|------|------|------|------|------|------|------|------|------|------|------|------|------|
| Qeqertarsuup Tunua | 3  | 0.33 | 0.31 | 0.33 | 0.29 | 0.3  | 0.31 | 0.3  | 0.36 | 0.3  | 0.3  | 0.31 | 0.32 | 0.31 | 0.32 | 0.34 | 0.31 | 0.3  | 0.31 | 0.3  | 0.38 |
| Qeqertarsuup Tunua | 4  | 0.33 | 0.29 | 0.32 | 0.32 | 0.32 | 0.32 | 0.3  | 0.3  | 0.32 | 0.33 | 0.33 | 0.33 | 0.33 | 0.33 | 0.31 | 0.32 | 0.32 | 0.31 | 0.34 | 100  |
| Qeqertarsuup Tunua | 5  | 0.27 | 0.28 | 0.27 | 0.25 | 0.27 | 0.27 | 0.25 | 0.26 | 0.26 | 0.26 | 0.27 | 0.25 | 0.27 | 0.27 | 0.27 | 0.27 | 0.28 | 0.28 | 0.28 | 0.28 |
| Qeqertarsuup Tunua | 6  | 0.27 | 0.25 | 0.25 | 0.27 | 0.26 | 0.27 | 0.25 | 0.25 | 0.25 | 0.25 | 0.29 | 0.25 | 0.23 | 0.27 | 0.26 | 0.25 | 0.26 | 0.27 | 0.25 | 0.25 |
| Qeqertarsuup Tunua | 7  | 0.27 | 0.26 | 0.24 | 0.26 | 0.27 | 0.25 | 0.25 | 0.25 | 0.25 | 0.26 | 0.27 | 0.26 | 0.26 | 0.27 | 0.26 | 0.27 | 0.25 | 0.24 | 0.26 | 0.25 |
| Qeqertarsuup Tunua | 8  | 0.28 | 0.3  | 0.29 | 0.29 | 0.28 | 0.29 | 0.28 | 0.3  | 0.28 | 0.28 | 0.29 | 0.28 | 0.29 | 0.3  | 0.28 | 0.28 | 0.27 | 0.46 | 0.33 | 0.29 |
| Qeqertarsuup Tunua | 9  | 0.34 | 0.33 | 0.33 | 0.32 | 0.36 | 0.33 | 0.32 | 0.33 | 0.33 | 0.34 | 0.31 | 0.33 | 0.34 | 0.38 | 0.34 | 0.36 | 0.36 | 0.34 | 0.33 | 0.34 |
| Qeqertarsuup Tunua | 10 | 0.53 | 0.69 | 0.57 | 0.49 | 0.52 | 0.52 | 0.68 | 0.66 | 0.62 | 0.58 | 0.6  | 0.56 | 0.56 | 0.71 | 0.67 | 0.59 | 0.63 | 0.63 | 0.49 | 0.49 |
| Nuup Kangerlua     | 3  | 0.33 | 0.31 | 0.33 | 0.29 | 0.3  | 0.31 | 0.3  | 0.36 | 0.3  | 0.3  | 0.31 | 0.32 | 0.31 | 0.32 | 0.34 | 0.31 | 0.3  | 0.31 | 0.3  | 0.38 |
| Nuup Kangerlua     | 4  | 0.33 | 0.29 | 0.32 | 0.32 | 0.32 | 0.32 | 0.3  | 0.3  | 0.32 | 0.33 | 0.33 | 0.33 | 0.33 | 0.33 | 0.31 | 0.32 | 0.32 | 0.31 | 0.34 | 100  |
| Nuup Kangerlua     | 5  | 0.27 | 0.28 | 0.27 | 0.25 | 0.27 | 0.27 | 0.25 | 0.26 | 0.26 | 0.26 | 0.27 | 0.25 | 0.27 | 0.27 | 0.27 | 0.27 | 0.28 | 0.28 | 0.28 | 0.28 |
| Nuup Kangerlua     | 6  | 0.27 | 0.25 | 0.25 | 0.27 | 0.26 | 0.27 | 0.25 | 0.25 | 0.25 | 0.25 | 0.29 | 0.25 | 0.23 | 0.27 | 0.26 | 0.25 | 0.26 | 0.27 | 0.25 | 0.25 |
| Nuup Kangerlua     | 7  | 0.27 | 0.26 | 0.24 | 0.26 | 0.27 | 0.25 | 0.25 | 0.25 | 0.25 | 0.26 | 0.27 | 0.26 | 0.26 | 0.27 | 0.26 | 0.27 | 0.25 | 0.24 | 0.26 | 0.25 |
| Nuup Kangerlua     | 8  | 0.28 | 0.3  | 0.29 | 0.29 | 0.28 | 0.29 | 0.28 | 0.3  | 0.28 | 0.28 | 0.29 | 0.28 | 0.29 | 0.3  | 0.28 | 0.28 | 0.27 | 0.46 | 0.33 | 0.29 |
| Nuup Kangerlua     | 9  | 0.34 | 0.33 | 0.33 | 0.32 | 0.36 | 0.33 | 0.32 | 0.33 | 0.33 | 0.34 | 0.31 | 0.33 | 0.34 | 0.38 | 0.34 | 0.36 | 0.36 | 0.34 | 0.33 | 0.34 |
| Nuup Kangerlua     | 10 | 0.53 | 0.69 | 0.57 | 0.49 | 0.52 | 0.52 | 0.68 | 0.66 | 0.62 | 0.58 | 0.6  | 0.56 | 0.56 | 0.71 | 0.67 | 0.59 | 0.63 | 0.63 | 0.49 | 0.49 |
| Porsangerfjorden   | 3  | 0.33 | 0.31 | 0.33 | 0.29 | 0.3  | 0.31 | 0.3  | 0.36 | 0.3  | 0.3  | 0.31 | 0.32 | 0.31 | 0.32 | 0.34 | 0.31 | 0.3  | 0.31 | 0.3  | 0.38 |
| Porsangerfjorden   | 4  | 0.33 | 0.29 | 0.32 | 0.32 | 0.32 | 0.32 | 0.3  | 0.3  | 0.32 | 0.33 | 0.33 | 0.33 | 0.33 | 0.33 | 0.31 | 0.32 | 0.32 | 0.31 | 0.34 | 100  |
| Porsangerfjorden   | 5  | 0.27 | 0.28 | 0.27 | 0.25 | 0.27 | 0.27 | 0.25 | 0.26 | 0.26 | 0.26 | 0.27 | 0.25 | 0.27 | 0.27 | 0.27 | 0.27 | 0.28 | 0.28 | 0.28 | 0.28 |
| Porsangerfjorden   | 6  | 0.27 | 0.25 | 0.25 | 0.27 | 0.26 | 0.27 | 0.25 | 0.25 | 0.25 | 0.25 | 0.29 | 0.25 | 0.23 | 0.27 | 0.26 | 0.25 | 0.26 | 0.27 | 0.25 | 0.25 |
| Porsangerfjorden   | 7  | 0.27 | 0.26 | 0.24 | 0.26 | 0.27 | 0.25 | 0.25 | 0.25 | 0.25 | 0.26 | 0.27 | 0.26 | 0.26 | 0.27 | 0.26 | 0.27 | 0.25 | 0.24 | 0.26 | 0.25 |
| Porsangerfjorden   | 8  | 0.28 | 0.3  | 0.29 | 0.29 | 0.28 | 0.29 | 0.28 | 0.3  | 0.28 | 0.28 | 0.29 | 0.28 | 0.29 | 0.3  | 0.28 | 0.28 | 0.27 | 0.46 | 0.33 | 0.29 |
| Porsangerfjorden   | 9  | 0.34 | 0.33 | 0.33 | 0.32 | 0.36 | 0.33 | 0.32 | 0.33 | 0.33 | 0.34 | 0.31 | 0.33 | 0.34 | 0.38 | 0.34 | 0.36 | 0.36 | 0.34 | 0.33 | 0.34 |
| Porsangerfjorden   | 10 | 0.53 | 0.69 | 0.57 | 0.49 | 0.52 | 0.52 | 0.68 | 0.66 | 0.62 | 0.58 | 0.6  | 0.56 | 0.56 | 0.71 | 0.67 | 0.59 | 0.63 | 0.63 | 0.49 | 0.49 |
